# Supplementary material for: Sex-specific pubertal and metabolic regulation of Kiss1 neurons via Nhlh2
Source: eLife journal article supplement (doi:10.7554/elife.69765), 2021-09-08

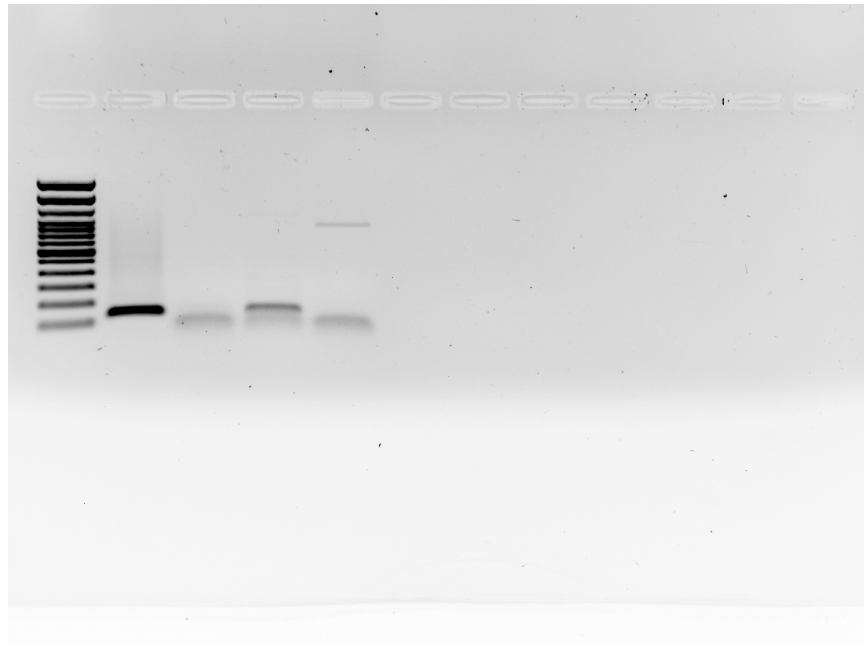

Supplement: fig2-data3 [file elife-69765-fig2-data3-v2.pdf]
