# Supplementary material for: Sex-specific pubertal and metabolic regulation of Kiss1 neurons via Nhlh2
Source: eLife. 2021 Sep 8;10:e69765. doi: 10.7554/eLife.69765 (PMC8439651; doi:10.7554/eLife.69765)
Supplement: Supplementary file 1. [file elife-69765-supp1.xlsx]

## Sheet: hKiss1
Matrix ID	Name	Score	Relative score	Sequence ID	Start	End	Strand	Predicted sequence
PF0015.1	CAGCTG	3.58924	0.833333	hKiss1_ENST00000367194.5	269	274	+	cacctg
PF0015.1	CAGCTG	3.58924	0.833333	hKiss1_ENST00000367194.5	306	311	+	caggtg
PF0015.1	CAGCTG	3.58924	0.833333	hKiss1_ENST00000367194.5	325	330	+	cagctc
PF0015.1	CAGCTG	3.58924	0.833333	hKiss1_ENST00000367194.5	352	357	+	tagctg
PF0015.1	CAGCTG	3.58924	0.833333	hKiss1_ENST00000367194.5	559	564	+	gagctg
PF0015.1	CAGCTG	3.58924	0.833333	hKiss1_ENST00000367194.5	993	998	+	gagctg
MA1529.1	NHLH2	11.639	0.844314	hKiss1_ENST00000367194.5	1018	1035	+	GGAGCCCAGCTGCCCACC
PF0015.1	CAGCTG	11.9197	1	hKiss1_ENST00000367194.5	1024	1029	+	CAGCTG
PF0015.1	CAGCTG	3.58924	0.833333	hKiss1_ENST00000367194.5	1055	1060	+	CAGGTG
PF0015.1	CAGCTG	3.58924	0.833333	hKiss1_ENST00000367194.5	1209	1214	+	cagatg
PF0015.1	CAGCTG	3.58924	0.833333	hKiss1_ENST00000367194.5	1482	1487	+	cagctc

## Sheet: mKiss1
Matrix ID	Name	Score	Relative score	Sequence ID	Start	End	Strand	Predicted sequence
PF0015.1	CAGCTG	11.9197	1	mKiss1_ENSMUST00000007433.4	231	236	+	cagctg
PF0015.1	CAGCTG	11.9197	1	mKiss1_ENSMUST00000007433.4	464	469	+	cagctg
PF0015.1	CAGCTG	11.9197	1	mKiss1_ENSMUST00000007433.4	594	599	+	cagctg
PF0015.1	CAGCTG	11.9197	1	mKiss1_ENSMUST00000007433.4	661	666	+	cagctg
PF0015.1	CAGCTG	11.9197	1	mKiss1_ENSMUST00000007433.4	732	737	+	cagctg
PF0015.1	CAGCTG	3.58924	0.833333	mKiss1_ENSMUST00000007433.4	761	766	+	cagctc
PF0015.1	CAGCTG	3.58924	0.833333	mKiss1_ENSMUST00000007433.4	916	921	+	gagctg
PF0015.1	CAGCTG	3.58924	0.833333	mKiss1_ENSMUST00000007433.4	1056	1061	+	AAGCTG
PF0015.1	CAGCTG	3.58924	0.833333	mKiss1_ENSMUST00000007433.4	1421	1426	+	gagctg

## Sheet: rKiss1
Matrix ID	Name	Score	Relative score	Sequence ID	Start	End	Strand	Predicted sequence
PF0015.1	CAGCTG	3.58924	0.833333	rKiss1_ENSRNOT00000077054.1	60	65	+	ctgctg
PF0015.1	CAGCTG	3.58924	0.833333	rKiss1_ENSRNOT00000077054.1	70	75	+	cagctt
PF0015.1	CAGCTG	3.58924	0.833333	rKiss1_ENSRNOT00000077054.1	90	95	+	caactg
PF0015.1	CAGCTG	3.58924	0.833333	rKiss1_ENSRNOT00000077054.1	115	120	+	catctg
PF0015.1	CAGCTG	3.58924	0.833333	rKiss1_ENSRNOT00000077054.1	162	167	+	caggtg
PF0015.1	CAGCTG	3.58924	0.833333	rKiss1_ENSRNOT00000077054.1	235	240	+	cacctg
PF0015.1	CAGCTG	3.58924	0.833333	rKiss1_ENSRNOT00000077054.1	429	434	+	cagctc
MA1529.1	NHLH2	9.12137	0.818584	rKiss1_ENSRNOT00000077054.1	488	505	+	gggcagcatgtgggcctc
PF0015.1	CAGCTG	11.9197	1	rKiss1_ENSRNOT00000077054.1	761	766	+	cagctg
PF0015.1	CAGCTG	3.58924	0.833333	rKiss1_ENSRNOT00000077054.1	1176	1181	+	cagttg
PF0015.1	CAGCTG	3.58924	0.833333	rKiss1_ENSRNOT00000077054.1	1472	1477	+	ccgctg

## Sheet: hTac3
Matrix ID	Name	Score	Relative score	Sequence ID	Start	End	Strand	Predicted sequence
PF0015.1	CAGCTG	3.58924	0.833333	hTac3_ENST00000300108.7	399	404	+	cagcta
PF0015.1	CAGCTG	3.58924	0.833333	hTac3_ENST00000300108.7	623	628	+	tagctg
PF0015.1	CAGCTG	3.58924	0.833333	hTac3_ENST00000300108.7	743	748	+	cagcag
PF0015.1	CAGCTG	3.58924	0.833333	hTac3_ENST00000300108.7	774	779	+	cagcag
PF0015.1	CAGCTG	3.58924	0.833333	hTac3_ENST00000300108.7	781	786	+	cagctc
PF0015.1	CAGCTG	3.58924	0.833333	hTac3_ENST00000300108.7	811	816	+	ctgctg
PF0015.1	CAGCTG	3.58924	0.833333	hTac3_ENST00000300108.7	936	941	+	cagctc
PF0015.1	CAGCTG	3.58924	0.833333	hTac3_ENST00000300108.7	971	976	+	gagctg
PF0015.1	CAGCTG	3.58924	0.833333	hTac3_ENST00000300108.7	1068	1073	+	CAGCGG
PF0015.1	CAGCTG	3.58924	0.833333	hTac3_ENST00000300108.7	1121	1126	+	GAGCTG
PF0015.1	CAGCTG	3.58924	0.833333	hTac3_ENST00000300108.7	1166	1171	+	gagctg
PF0015.1	CAGCTG	3.58924	0.833333	hTac3_ENST00000300108.7	1211	1216	+	cagatg
PF0015.1	CAGCTG	3.58924	0.833333	hTac3_ENST00000300108.7	1263	1268	+	cacctg
PF0015.1	CAGCTG	3.58924	0.833333	hTac3_ENST00000300108.7	1278	1283	+	gagctg
PF0015.1	CAGCTG	11.9197	1	hTac3_ENST00000300108.7	1393	1398	+	cagctg

## Sheet: mTAC2
Matrix ID	Name	Score	Relative score	Sequence ID	Start	End	Strand	Predicted sequence
PF0015.1	CAGCTG	3.58924	0.833333	mTac2_ENSMUST00000026466.4	55	60	+	cagctc
PF0015.1	CAGCTG	11.9197	1	mTac2_ENSMUST00000026466.4	62	67	+	cagctg
PF0015.1	CAGCTG	3.58924	0.833333	mTac2_ENSMUST00000026466.4	65	70	+	ctgctg
PF0015.1	CAGCTG	3.58924	0.833333	mTac2_ENSMUST00000026466.4	68	73	+	ctgctg
PF0015.1	CAGCTG	3.58924	0.833333	mTac2_ENSMUST00000026466.4	183	188	+	catctg
PF0015.1	CAGCTG	11.9197	1	mTac2_ENSMUST00000026466.4	353	358	+	cagctg
PF0015.1	CAGCTG	3.58924	0.833333	mTac2_ENSMUST00000026466.4	362	367	+	cagctc
PF0015.1	CAGCTG	3.58924	0.833333	mTac2_ENSMUST00000026466.4	521	526	+	cagctt
PF0015.1	CAGCTG	3.58924	0.833333	mTac2_ENSMUST00000026466.4	577	582	+	gagctg
PF0015.1	CAGCTG	3.58924	0.833333	mTac2_ENSMUST00000026466.4	587	592	+	cggctg
PF0015.1	CAGCTG	3.58924	0.833333	mTac2_ENSMUST00000026466.4	753	758	+	ctgctg
PF0015.1	CAGCTG	3.58924	0.833333	mTac2_ENSMUST00000026466.4	767	772	+	cagctt
PF0015.1	CAGCTG	3.58924	0.833333	mTac2_ENSMUST00000026466.4	774	779	+	ctgctg
PF0015.1	CAGCTG	3.58924	0.833333	mTac2_ENSMUST00000026466.4	965	970	+	gagctg
PF0015.1	CAGCTG	3.58924	0.833333	mTac2_ENSMUST00000026466.4	1023	1028	+	CAGCAG
PF0015.1	CAGCTG	3.58924	0.833333	mTac2_ENSMUST00000026466.4	1036	1041	+	CAGCTC
PF0015.1	CAGCTG	3.58924	0.833333	mTac2_ENSMUST00000026466.4	1053	1058	+	CAGCTA
PF0015.1	CAGCTG	3.58924	0.833333	mTac2_ENSMUST00000026466.4	1061	1066	+	CAGCTC
PF0015.1	CAGCTG	3.58924	0.833333	mTac2_ENSMUST00000026466.4	1103	1108	+	aagctg
PF0015.1	CAGCTG	3.58924	0.833333	mTac2_ENSMUST00000026466.4	1215	1220	+	gagctg
PF0015.1	CAGCTG	3.58924	0.833333	mTac2_ENSMUST00000026466.4	1232	1237	+	catctg
PF0015.1	CAGCTG	3.58924	0.833333	mTac2_ENSMUST00000026466.4	1452	1457	+	aagctg

## Sheet: rTac3
Matrix ID	Name	Score	Relative score	Sequence ID	Start	End	Strand	Predicted sequence
PF0015.1	CAGCTG	3.58924	0.833333	rTac3_ENSRNOT00000005679.2	37	42	+	ccgctg
PF0015.1	CAGCTG	3.58924	0.833333	rTac3_ENSRNOT00000005679.2	94	99	+	cagctt
PF0015.1	CAGCTG	3.58924	0.833333	rTac3_ENSRNOT00000005679.2	176	181	+	catctg
PF0015.1	CAGCTG	3.58924	0.833333	rTac3_ENSRNOT00000005679.2	269	274	+	caggtg
PF0015.1	CAGCTG	11.9197	1	rTac3_ENSRNOT00000005679.2	360	365	+	cagctg
MA1529.1	NHLH2	10.6468	0.834174	rTac3_ENSRNOT00000005679.2	363	380	+	ctgaggcagctgagtcag
PF0015.1	CAGCTG	11.9197	1	rTac3_ENSRNOT00000005679.2	369	374	+	cagctg
PF0015.1	CAGCTG	3.58924	0.833333	rTac3_ENSRNOT00000005679.2	591	596	+	gagctg
PF0015.1	CAGCTG	3.58924	0.833333	rTac3_ENSRNOT00000005679.2	673	678	+	cagcta
PF0015.1	CAGCTG	3.58924	0.833333	rTac3_ENSRNOT00000005679.2	772	777	+	ctgctg
PF0015.1	CAGCTG	3.58924	0.833333	rTac3_ENSRNOT00000005679.2	780	785	+	caactg
PF0015.1	CAGCTG	3.58924	0.833333	rTac3_ENSRNOT00000005679.2	793	798	+	ctgctg
PF0015.1	CAGCTG	3.58924	0.833333	rTac3_ENSRNOT00000005679.2	1000	1005	+	gAGCTG
PF0015.1	CAGCTG	3.58924	0.833333	rTac3_ENSRNOT00000005679.2	1062	1067	+	CAGCAG
PF0015.1	CAGCTG	3.58924	0.833333	rTac3_ENSRNOT00000005679.2	1091	1096	+	CAGCCG
PF0015.1	CAGCTG	3.58924	0.833333	rTac3_ENSRNOT00000005679.2	1099	1104	+	CAGCTC
PF0015.1	CAGCTG	3.58924	0.833333	rTac3_ENSRNOT00000005679.2	1141	1146	+	aagctg
PF0015.1	CAGCTG	3.58924	0.833333	rTac3_ENSRNOT00000005679.2	1260	1265	+	gagctg
PF0015.1	CAGCTG	3.58924	0.833333	rTac3_ENSRNOT00000005679.2	1277	1282	+	catctg
